# Supplementary material
Source: publisher figshare collection journal article supplement (https://sage.figshare.com/ndownloader/files/15964358)
Supplement: Supplementary file 1 [file 15964358]

## Supplemental Materials and Analyses

### Exclusionary Cues (Exploratory Measure)

**Exclusionary cues measure.** As an exploratory measure of exclusion, we created an 18-item assessment of how tempted participants were to exhibit exclusionary cues towards each player (e.g., “Interrupt *Alex/Pat* when this player is talking.”) on a 1 (*Not at all tempted*) to 9 (*Very tempted*) scale ( $\alpha \geq .78$ ). These exclusionary cues were based on examples from the signals of social exclusion/inclusion outlined by Kerr and Levine (2008). For this measure, we used a similar approach of measuring behavioral temptations as previous research (Buckley, Winkel, & Leary, 2004).

**Exclusionary cues results for Study 2.** We found a significant Target Member Performance  $\times$  Group Member interaction ( $F(1,59)=7.44, p=.008, \eta_p^2=.11$ ) on the temptation to give exclusionary cues to the other players. Specifically, participants were more tempted to exhibit exclusionary cues towards the poor-performing target player compared with the equal-performing target player and the non-target player in the poor-performing target condition,  $t_s \geq -2.48, p_s \leq .016, d_s \geq 0.64, 95\% CI = [-1.60, -0.17]$ .

**Exclusionary cues results for Study 3.** Similar to Study 2, on this exploratory measure, we found a significant Target Member Performance  $\times$  Group Member interaction ( $F(1,67)=5.77, p=.019, \eta_p^2=.08$ ) on how tempted participants were to exhibit exclusionary cues to each player. Participants indicated more of a temptation to exhibit exclusionary cues to the poor-performing target compared with the equal-performing target player,  $t_{\text{adjusted}}(67)=-2.51, p=.016, d=0.60, 95\% CI = [-1.43, -0.16]$ . Participants were also more tempted to exhibit exclusionary cues towards the poor-performing target compared to the non-target player in the poor-performing target condition, but only to a marginal degree,  $t(33)=1.90, p=.066, d=0.39, 95\% CI = [-0.03, 1.01]$ .

Supplemental Materials and Analyses Table 1

*Exploratory exclusionary cues means and standard deviations.*

| Study   | Group Member |           |            |           |          |           |              |           |            |           |          |           |
|---------|--------------|-----------|------------|-----------|----------|-----------|--------------|-----------|------------|-----------|----------|-----------|
|         | Non-target   |           |            |           |          |           | Target       |           |            |           |          |           |
|         | Normal-Speed |           | Slow-speed |           | Total    |           | Normal-Speed |           | Slow-speed |           | Total    |           |
|         | <i>M</i>     | <i>SD</i> | <i>M</i>   | <i>SD</i> | <i>M</i> | <i>SD</i> | <i>M</i>     | <i>SD</i> | <i>M</i>   | <i>SD</i> | <i>M</i> | <i>SD</i> |
| Study 2 | 2.52         | 1.47      | 2.44       | 1.14      | 2.48     | 1.29      | 2.30         | 1.22      | 3.19       | 1.52      | 2.78     | 1.45      |
| Study 3 | 2.92         | 0.85      | 3.06       | 0.74      | 2.99     | 0.79      | 2.75         | 0.98      | 3.54       | 1.58      | 3.14     | 1.36      |

## **Supplemental Analyses**

The supplemental analyses include Multivariate Analyses of Variance (MANOVAs) to establish having multivariate effects of our experiment manipulations. We also included analyses comparing the non-target group member in a burdensome target condition to both the target and non-target group members in a non-burdensome target condition. We also compared the target and non-target group members in the non-burdensome target group member conditions (control condition).

### **Study 1**

#### **MANOVA Analysis**

We conducted a MANOVA to establish multivariate effects of our experiment manipulations. For Study 1, we did, indeed, find significant multivariate effects,  $F(6, 206)=33.69, p<.001$ , Wilk’s  $\lambda=.51, \eta_p^2=.50$ ). Specifically, we found significant Target Member Performance  $\times$  Group Member interactions for all of our variables using a MANOVA,  $F_s \geq 78.03, p_s < .001, \eta_p^2 \geq .27$ .

#### **Ostracism of Group Members**

Suggested by a marginal effect, participants indicated they ostracized the non-target of a group with a burdensome target more than the non-target or target of a group with a non-burdensome target,  $t_s \geq 1.91, p_s \leq .058, d_s \geq 0.26, 95\%CI = [-0.09, .54]$ . When the recalled experience was with a non-burdensome target, there was no significant difference between the non-target and target group members,  $t = -1.53, p = .130, d = 0.17, 95\%CI = [-0.29, 0.04]$ .

#### **Psychological Pain: NRS-11 Pain Measure and Pain Faces Scale**

For the NRS-11 pain measure, we found that the non-target group member of a group with a burdensome target caused more psychological pain than both the non-target and target

group members when the group interaction was with a non-burdensome target,  $ts \geq 3.61$ ,  $ps < .001$ ,  $ds \geq 0.48$ ,  $95\%CI = [0.50, 1.71]$ . When the experience participants recalled was with a non-burdensome target, there were no significant differences between non-target and target group members,  $t = -.11$ ,  $p = .912$ ,  $d = 0.01$ ,  $95\%CI = [-0.38, 0.34]$ .

Evaluating participants’ responses on the Pain Faces Scale, we found participants felt more psychological pain when they interacted with the non-target of a group with a burdensome target than either the target or non-target when the recalled group experience was with a non-burdensome target,  $ts \geq 3.44$ ,  $ps = .001$ ,  $ds \geq 0.46$ ,  $95\%CI = [0.37, 1.37]$ . There was no significant difference between the non-target and target group members in the non-burdensome Target Member Performance condition,  $t = -.39$ ,  $p = .698$ ,  $d = 0.05$ ,  $95\%CI = [-0.37, 0.25]$ .

### **Liking and Burdensomeness of the Group Members**

For liking, we found there were no significant differences between the players,  $ts \leq -1.71$ ,  $ps \geq .088$ ,  $ds \leq 0.24$ ,  $95\%CI = [-0.90, 0.06]$  when comparing the non-target player of a group that included a burdensome target player with both the non-target and target players in the non-burdensome condition or when comparing the non-target to the target players in the non-burdensome target player condition. Regarding burdensomeness, participants indicated the non-target in a group with a burdensome target to be more burdensome than the target and non-target members of a group comprised of a non-burdensome target,  $ts \geq 3.29$ ,  $ps \leq .001$ ,  $ds \geq 0.44$ ,  $95\%CI = [0.26, 1.04]$ . Participants also reported the non-target player was more burdensome than the target player in the non-burdensome target group,  $t = -2.07$ ,  $p = .044$ ,  $d = 0.27$ ,  $95\%CI = [-0.50, -0.01]$ .

## The Influence of Psychological Pain on Ostracizing

**Self-report.** Participants were more motivated by psychological pain to ostracize the non-target in a group with a burdensome target condition compared to either the target or non-target in the non-burdensome target member condition,  $ts \geq 3.42$ ,  $ps \leq .001$ ,  $ds \geq 0.46$ , 95%CI=[0.22, 0.82]. Examining the non-burdensome target condition, there was no significant difference between the target and non-target group members,  $t = -1.52$ ,  $p = .132$ ,  $d = 0.20$ , 95%CI=[-0.32, 0.04].

## Study 2

### Manipulation Check

For the manipulation check, there were no significant differences between the remaining comparisons of players,  $ts \leq -0.16$ ,  $ps \geq .877$ ,  $ds \leq 0.04$ , 95%CI=[-17.68, 15.13].

### MANOVA Analysis

A MANOVA analysis supported having a significant multivariate effect of our experiment manipulations,  $F(7, 52) = 6.08$ ,  $p < .001$ , Wilk’s  $\lambda = .55$ ,  $\eta_p^2 = .45$ ). For each of our Target Member Performance  $\times$  Group Member, we found significant effects for our variables,  $F_s \geq 6.77$ ,  $ps \leq .012$ ,  $\eta_p^2 s \geq .11$ .

### Ostracism

**Self-reported ostracism of players.** There were no significant differences between the remaining combinations of players,  $ts \leq -1.70$ ,  $ps \geq .102$ ,  $ds \leq 0.43$ , 95%CI=[-1.22, 0.12].

**Exclusionary cues.** Analyses of the exclusionary cues found no significant differences when examining the remaining combinations of players,  $ts \leq -0.76$ ,  $ps \geq .451$ ,  $ds \leq 0.16$ , 95%CI=[-0.82, 0.37].

**Psychological pain: NRS-11 pain measure and Pain Faces Scale.** For the NRS-11, there were no significant differences between the remaining combinations of players,  $ts \leq -1.16$ ,  $ps \geq .255$ ,  $ds \leq 0.22$ ,  $95\%CI = [-1.23, 0.34]$ . Similarly, for the Pain Faces Scale, there were no significant differences in psychological pain levels for the remaining comparisons between players,  $ts \leq -1.55$ ,  $ps \geq .133$ ,  $ds \leq .28$ ,  $95\%CI = [-0.66, 0.09]$ .

### **Liking and Burdensomeness of the Group Members**

Examining liking, we found a marginal difference between the non-target player in the poor-performing target player condition compared to the non-target player in the equal-performing target player condition,  $t = -1.95$ ,  $p = .056$ ,  $d = 0.50$ ,  $95\%CI = [-1.75, 0.02]$ . Otherwise, there were no significant differences between the remaining comparisons,  $ts \leq -1.08$ ,  $ps \geq .286$ ,  $ds \leq 0.28$ ,  $95\%CI = [-1.35, 0.41]$ . For burdensomeness, results indicated there were no remaining significant differences between the combinations of players,  $ts \leq 1.24$ ,  $ps \geq .219$ ,  $ds \leq 0.32$ ,  $95\%CI = [-0.20, 0.84]$ .

### **The Influence of Psychological Pain on Ostracizing**

**Self-report.** There were no significant differences between the remaining player comparisons when examining how much participants’ psychological pain motivated them to ostracize,  $ts \leq -1.20$ ,  $ps \geq .242$ ,  $ds \leq 0.31$ ,  $95\%CI = [-1.02, 0.27]$ .

## **Study 3**

### **Manipulation Check**

Participants found the non-target in the slow-speed target player condition took longer to throw the ball than both the non-target and target of a game that included a normal-speed target,  $ts \geq -1.96$ ,  $ps \leq .057$ ,  $ds \geq 0.48$ ,  $95\%CI = [-5.20, .08]$ . We did not find a significant difference on

how long it took the players to throw the ball between the non-target and target player in normal-speed target player condition,  $t(34)=-1.30$ ,  $p=.202$ ,  $d=0.21$ , 95%CI=[-1.17, 0.26].

### MANOVA Analysis

Our MANOVA analysis indicated a significant multivariate effect of our experiment manipulations on the outcomes,  $F(7, 61)=7.85$ ,  $p<.001$ , Wilk’s  $\lambda=.53$ ,  $\eta_p^2=.47$ ). Examining the interaction effects further, we found a significant Target Member Performance  $\times$  Group Member for all of our variables,  $F_s \geq 5.77$ ,  $p_s \leq .019$ ,  $\eta_p^2 \geq .08$ .

### Ostracism

**Self-reported ostracism of players.** There were no significant differences for the remaining comparisons between players on self-reported ostracism of the players,  $t_s \leq -0.86$ ,  $p_s \geq .395$ ,  $d_s \leq 0.21$ , 95%CI=[-0.97, 0.39].

**Exclusionary cues.** Examining the remaining comparisons between the players, there were no significant differences,  $t_s \leq -1.47$ ,  $p_s \geq .146$ ,  $d_s \leq 0.35$ , 95%CI=[-0.73, 0.11].

### Psychological Pain: NRS-11 Pain Measure and Pain Faces Scale

Examining the NRS-11 measures, we found participants felt more psychological pain when playing with the non-target in the slow-speed target player Cyberball condition than both the non-target and target player in the normal-speed target player condition,  $t_s \geq -3.83$ ,  $p_s < .001$ ,  $d_s \geq 0.93$ , 95%CI=[-2.57, -0.80]. There was no difference between players in the normal-speed target player condition,  $t=-1.37$ ,  $p=.180$ ,  $d=0.15$ , 95%CI=[-0.53, 0.10].

For the Pain Faces Scale, when we examined the remaining comparisons, the non-target in the normal-speed target player game caused marginally more psychological pain than the non-target player in the slow-speed target player game,  $t=1.77$ ,  $p=.08$ ,  $d=0.43$ , 95%CI=[-0.04, 0.59].

Otherwise, there were no remaining significant differences in comparisons between the players,  $ts \leq 1.45$ ,  $ps \geq .15$ ,  $ds \leq 0.35$ , 95%CI=[-0.10, 0.60].

### **Liking and Burdensomeness of the Group Members**

Participants liked the non-target player in the slow-speed target player game at least marginally more than either the target or non-target players in the normal-speed target player game,  $ts \geq -1.97$ ,  $ps \leq .053$ ,  $ds \geq 0.47$ , 95%CI=[-1.75, 0.01]. There was no significant difference between the target and non-target in the normal-speed target player condition,  $t=0.32$ ,  $p=.752$ ,  $d=0.07$ , 95%CI=[-0.62, 0.84]. Investigating burdensomeness of the players, there were no remaining significant differences between the players,  $ts \leq 1.71$ ,  $ps \geq .092$ ,  $ds \leq 0.41$ , 95%CI=[-0.07, 0.93].

### **The Influence of Pain on Ostracizing**

**Self-report.** For self-reported assessment of how much participants ostracized the players, we found there were no significant differences when evaluating the remaining comparisons between the players,  $ts \leq 1.15$ ,  $ps \geq .256$ ,  $ds \leq 0.28$ , 95%CI=[-0.18, 0.68].

## **Study 4**

### **Manipulation Check**

Similar to Study 3, participants indicated the non-target in the slow-speed target player condition took longer to throw the ball than either the non-target or target player of a normal-speed target player game,  $ts \geq -3.58$ ,  $ps < .001$ ,  $ds \geq 0.65$ , 95%CI=[-5.06, -1.42]. There was no significant difference between the target and non-target in the normal-speed target player condition,  $t=0.50$ ,  $p=.618$ ,  $d=0.04$ , 95%CI=[-0.17, 0.29].



## MANOVA Analysis

Conducting a MANOVA test, we found a significant multivariate effect of our experiment manipulations on the outcomes,  $F(7, 113)=7.02, p<.001$ , Wilk’s  $\lambda=.70, \eta_p^2=.30$ ). Specifically, analyses indicated a significant Target Member Performance  $\times$  Group Member for all of our variables,  $F_s \geq 4.45, p_s \leq .037, \eta_p^2 \geq .04$ .

## Psychological Pain: NRS-11 pain measure, Pain Faces Scale, and McGill Pain

### Questionnaire

Starting with the NRS-11 measures, participants felt at least marginally more psychological pain when playing with the non-target in the slow-speed target player condition than the non-target in the normal-speed target player condition,  $t_{\text{adjusted}}=-1.81, p=.073, d=0.33$ , 95%CI=[-1.36, 0.06]. There were no significant differences for the remaining comparisons,  $t_s \leq 1.60, p_s \geq .114, d_s \leq 0.29$ , 95%CI=[-1.27, 0.14].

For the Pain Faces Scale, there were no significant differences between the non-target in the slow-speed target player game compared to the target or non-target players in the normal-speed target player game,  $t_s \leq -0.73, p_s \geq .468, d_s \leq 0.13$ , 95%CI=[-0.45, 0.21]. However, there was a significant difference between the target and non-target player in the normal-speed target player game (control condition;  $t=2.10, p=.040, d=0.21$ , 95%CI=[0.01, 0.35]).

Examining the results from the McGill Pain Questionnaire, we found no significant differences on the remaining comparisons,  $t_s \leq -0.34, p_s \geq .733, d_s \leq 0.06$ , 95%CI=[-0.67, 0.47].

## Negative Affect Towards the Group Members

For our PANAS measure of negative affect towards the group members, we found no significant differences on any remaining comparisons,  $t_s \leq 0.51, p_s \geq .611, d_s \leq 0.08$ , 95%CI=[-0.16,

0.27]. Likewise, there were no significant differences between remaining comparisons for burden-specific affect,  $ts \leq 1.26$ ,  $ps \geq .212$ ,  $ds \leq 0.08$ , 95%CI=[-0.04, 0.16].

### **Liking and Burdensomeness of the Group Members**

For liking, we found a marginally significant difference between the target and non-target players in the normal-speed target player game (control condition;  $t = -1.94$ ,  $p = .057$ ,  $d = 0.22$ , 95%CI=[-0.65, 0.01]). For the remaining comparisons on liking of the players, there were no significant differences,  $ts \leq -1.70$ ,  $ps \geq .092$ ,  $ds \leq$ , 95%CI=[-1.07, 0.08]. Looking at burdensomeness of the group members, there were no significant differences between remaining comparisons,  $ts \leq 0.86$ ,  $ps \geq .392$ ,  $ds \leq 0.11$ , 95%CI=[-0.16, 0.40].

## **Study 5**

### **Manipulation Check**

Similar to both of the previous Cyberball studies, (Studies 3 and 4), participants reported the non-target in the slow-speed target player condition took longer to throw the ball than both the non-target or target player of a normal-speed target player game,  $ts \geq -29.96$ ,  $ps \leq .007$ ,  $ds \geq 0.053$  95%CI=[-3.65, -0.61]. Again, there was no significant difference between the target and non-target in the normal-speed target player condition,  $t = 0.50$ ,  $p = .618$ ,  $d = 0.04$ , 95%CI=[-0.17, 0.29].

### **MANOVA Analysis**

Our MANOVA analysis revealed a significant multivariate effect of our experiment manipulations,  $F(7, 110) = 11.04$ ,  $p < .001$ , Wilk’s  $\lambda = .59$ ,  $\eta_p^2 = .41$ ). We found significant Target Member Performance  $\times$  Group Member for all of our variables,  $Fs \geq 5.94$ ,  $ps \leq .016$ ,  $\eta_p^2 \geq .05$ .

## **Psychological Pain: NRS-11 pain measure, Pain Faces Scale, and McGill Pain**

### **Questionnaire**

As we found in several of the previous studies, testing the NRS-11 pain measure, participants felt more psychological pain when playing with the non-target in the slow-speed target player Cyberball condition than both the non-target and target player in the normal-speed target player condition,  $t_{s} \geq -2.12$ ,  $p_{s} \leq .036$ ,  $d_{s} \geq 0.39$ , 95%CI=[-1.43, -0.05]. There was no significant difference between the target and non-target in the normal-speed target player condition,  $t = -1.45$ ,  $p = .151$ ,  $d = 0.12$ , 95%CI=[-0.43, 0.07].

For the Pain Faces Scale assessment, we found no significant differences for the remaining comparisons,  $t_{s} \leq -0.92$ ,  $p_{s} \geq .359$ ,  $d_{s} \leq 0.17$ , 95%CI=[-0.45, 0.16].

Lastly, examining the McGill Pain Questionnaire results, we found no significant differences on the remaining comparisons,  $t_{s} \leq -1.32$ ,  $p_{s} \geq .191$ ,  $d_{s} \leq 0.07$ , 95%CI=[-0.26, 0.05].

## **Negative Affect Towards the Group Members, Liking of the Group Members, and Burdensomeness of the Group Members**

For the our general measure of negative affect towards the player, the PANAS, we found no significant differences on the remaining comparisons,  $t_{s} \leq -1.66$ ,  $p_{s} \geq .100$ ,  $d_{s} \leq 0.30$ , 95%CI=[-0.65, 0.06]. Likewise, there were no remaining significant comparisons for burden-specific affect,  $t_{s} \leq -0.94$ ,  $p_{s} \geq .349$ ,  $d_{s} \leq 0.17$ , 95%CI=[-0.73, 0.26]. For liking of the group members, there were no remaining significant differences as well,  $t_{s} \leq -0.74$ ,  $p_{s} \geq .464$ ,  $d_{s} \leq 0.14$ , 95%CI=[-0.36, 0.78]. For how burdensome participants rated the players, participants indicated the non-target in a slow-player target game was, at least, marginally more burdensome than the non-target and target player in the normal-speed target player game,  $t_{s} \geq -1.87$ ,  $p_{s} \leq .064$ ,  $d_{s} \geq 0.35$ , 95%CI=[-0.91,

0.03]. There was no significant difference between the target and non-target in the normal-speed target player condition,  $t=-0.23$ ,  $p=.822$ ,  $d=0.03$ , 95% CI=[-0.30, 0.24].
